# Supplementary material
Source: publisher site journal article supplement (https://static.cambridge.org/content/id/urn:cambridge.org:id:article:S1041610218001436/resource/name/S1041610218001436supp003.docx)
Supplement: Supplementary file 1 [file S1041610218001436supp003.docx]

# Appendix A3.

**Publication Bias Funnel Plots for Anxiety, Depression, Burden and Distress Meta-Analyses**

*Note.* Displays observed (outlined) and imputed studies (filled)


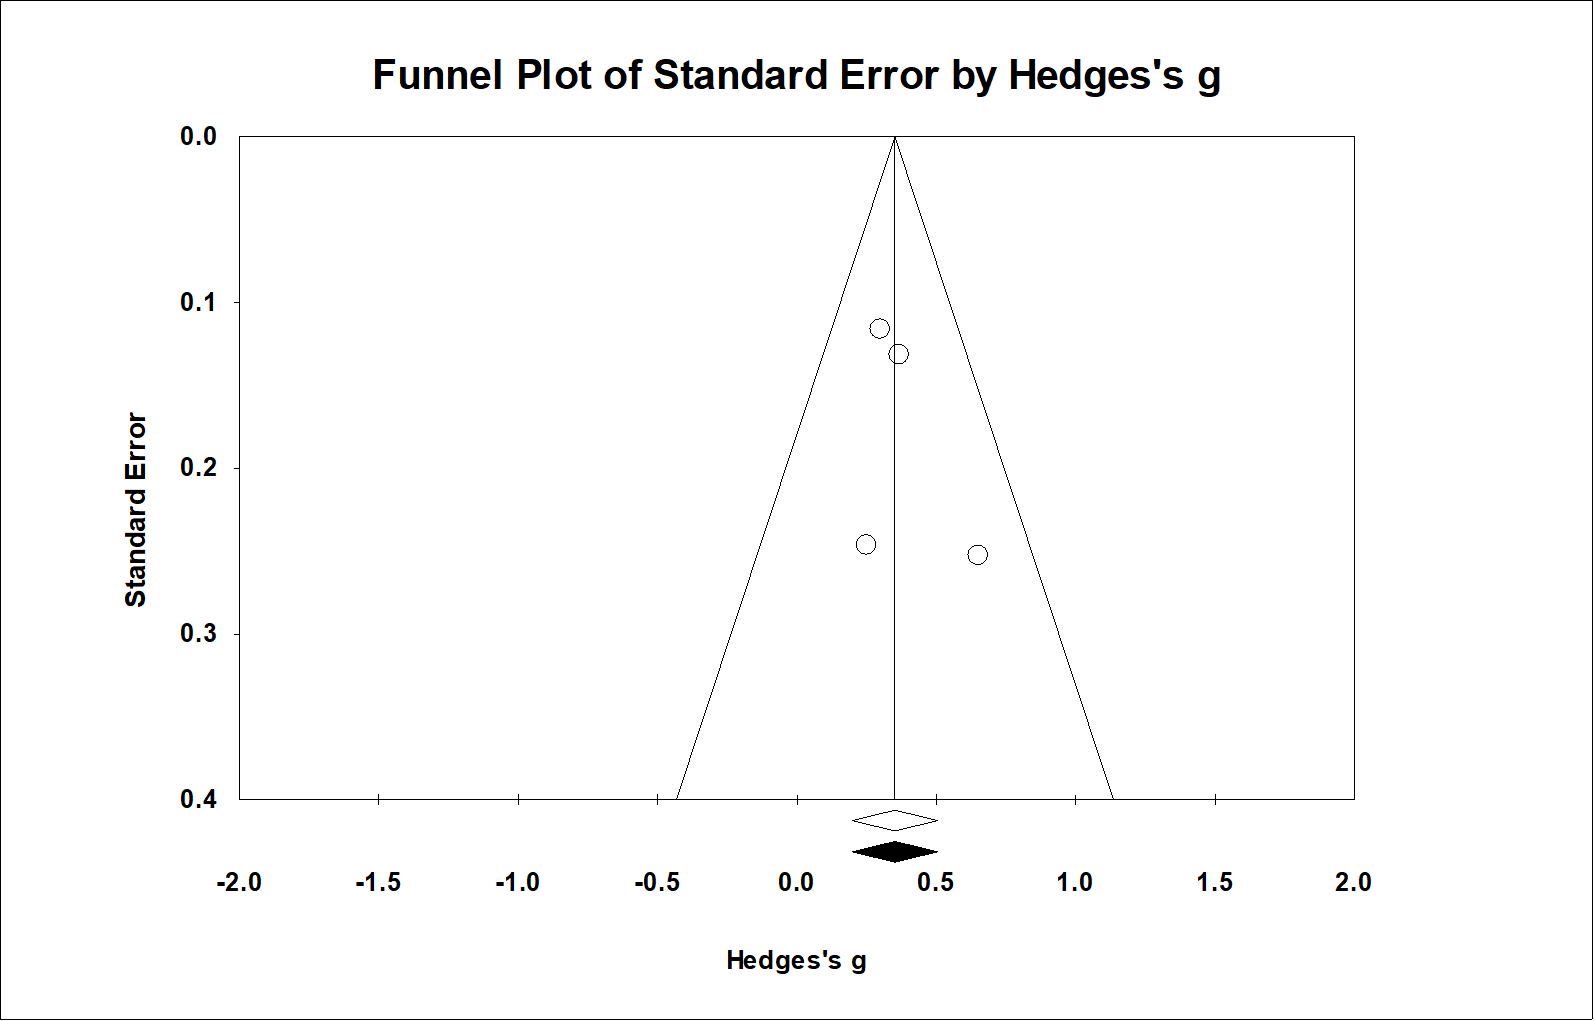


**Anxiety**


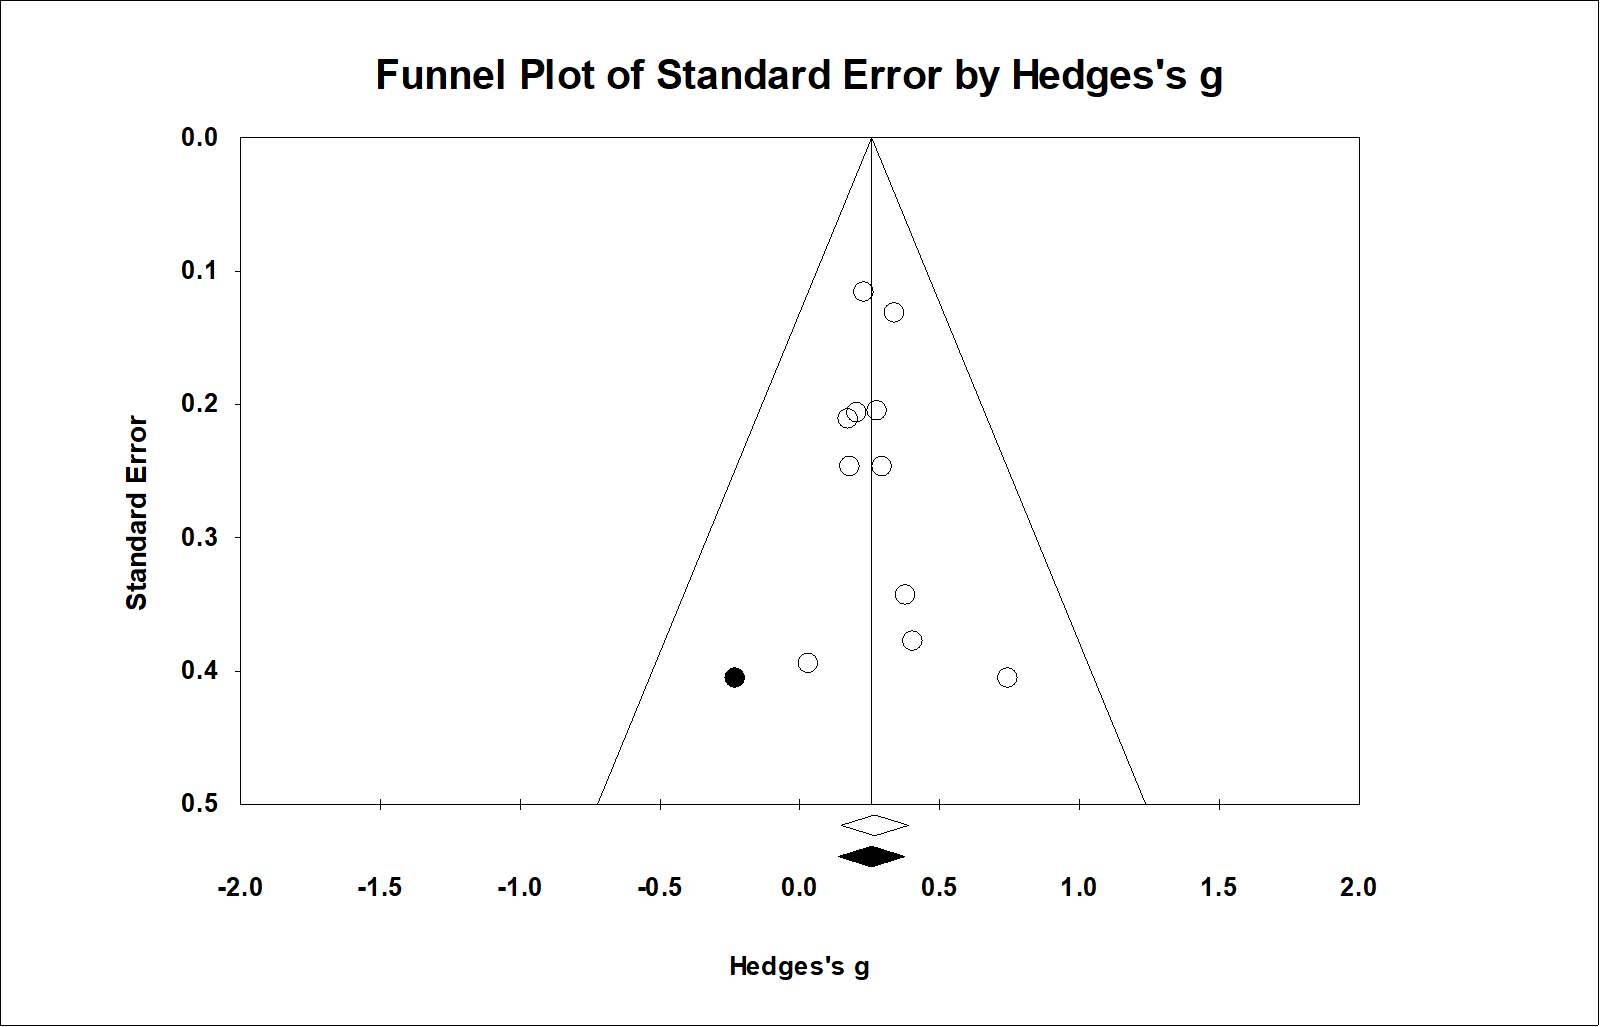


**Depression**


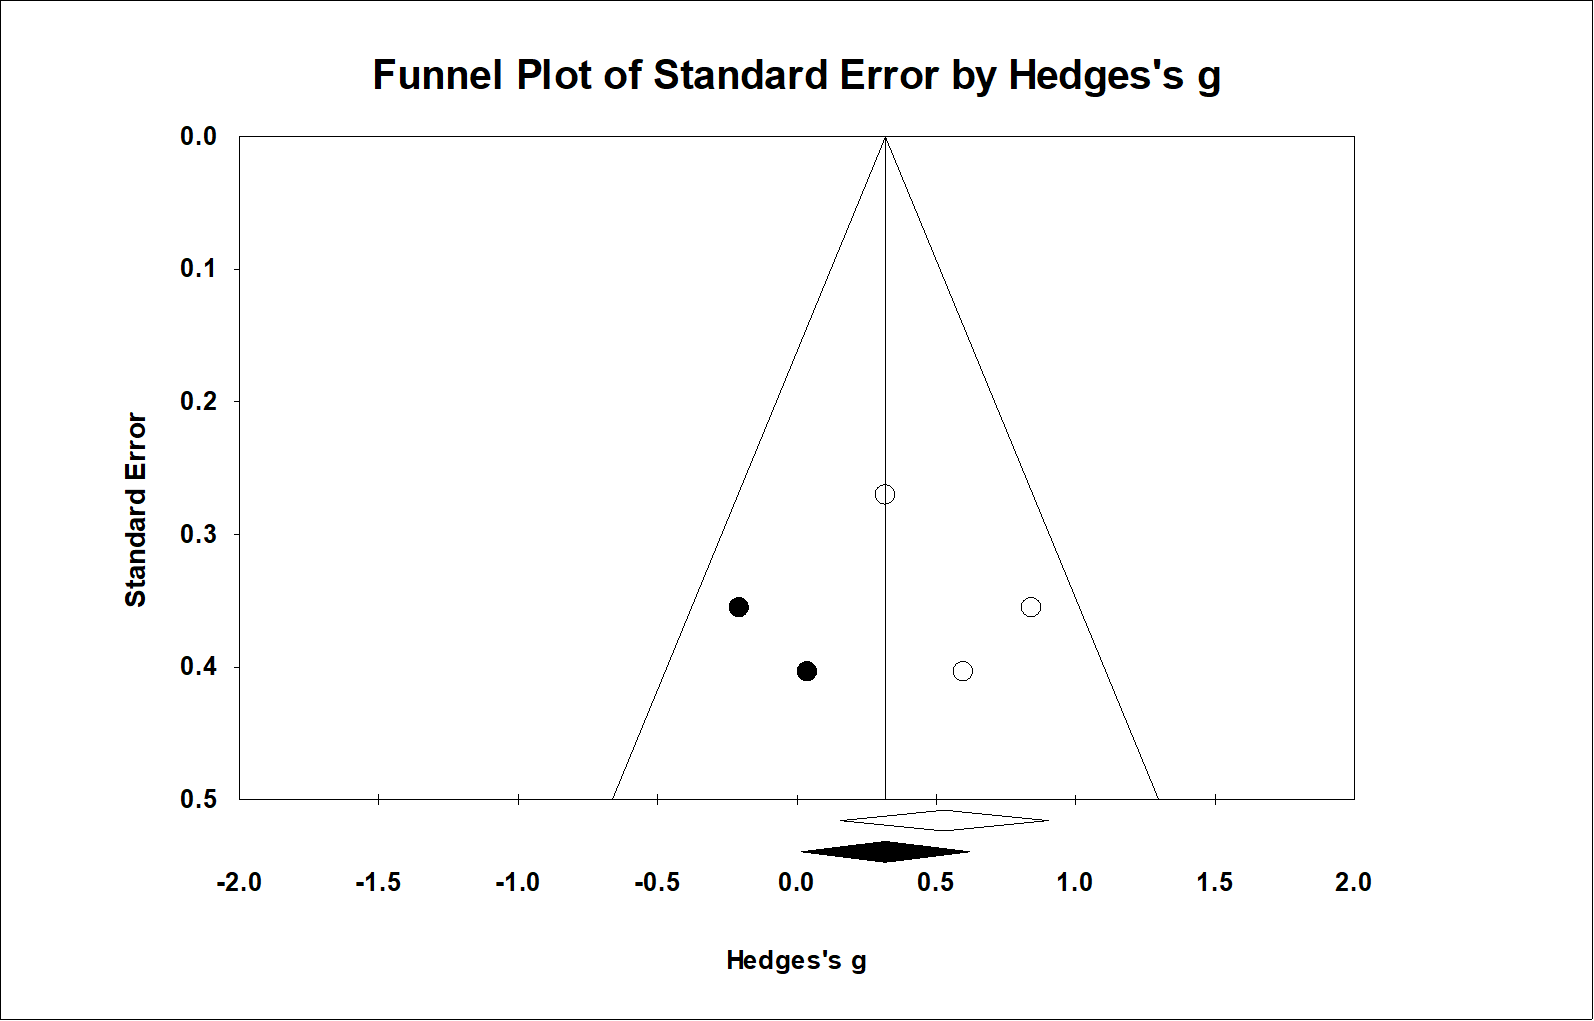


**Burden**


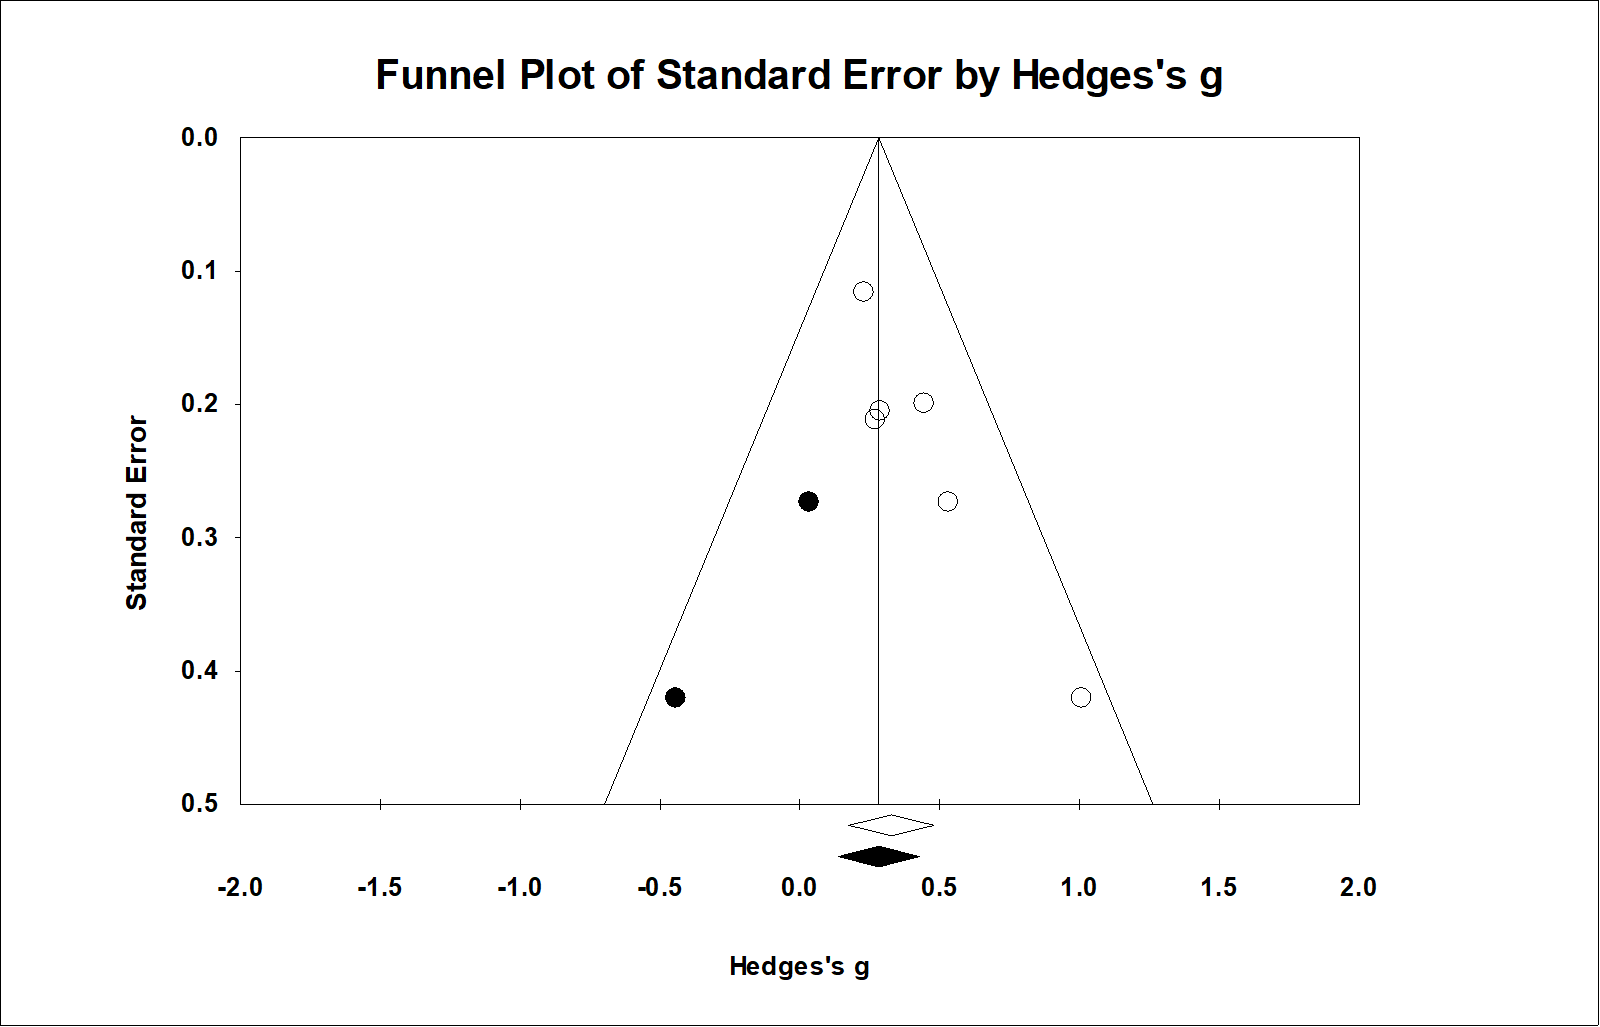


**Distress**
